# Supplementary material
Source: Springer Nature journal article supplement (https://www.springermedizin.de/resource/supplementary/13054_2012_949_MOESM1_ESM.pdf/9709610)
Supplement: MOESM1 [file 9709610]

34 Patients  
VV ECMO  
Jan 2009 – Apr 2011

Included 21 ARDS  
pneumonia patients:

- H1N1 = 8

Excluded 13 patients:

- 4 post lung transplant
- 2 pulmonary trauma
- 2 interstitial lung disease
- 1 cystic fibrosis
- 4 other

Survival 9/13

3 died

18 patients survived at  
hospital discharge

2 declined  
1 lost to follow up

15 included in follow up:

- H1N1 = 8
